# Supplementary material for: A temperature-based approach to predicting lost data from highly seasonal pollutant data sets
Source: Royal Society of Chemistry journal article supplement (doi:10.1039/c3em00131h), 2013-01-01
Supplement: c3em00131h.pdf [file c3em00131h.pdf]

## A temperature-based approach to predicting lost data from highly seasonal pollutant data sets

Richard J. C. Brown<sup>1\*</sup>, Andrew S. Brown<sup>1</sup>, Ki-Hyun Kim<sup>2</sup>

1 Analytical Science Division, National Physical Laboratory, Hampton Road Teddington, Middlesex, TW11 0LW, UK.

2 Department of Environment & Energy, Sejong University, Seoul 143-747, Korea

\* Corresponding author. Tel.: +44 20 8943 6409 Fax : +44 20 8614 0423

E-mail address : [richard.brown@npl.co.uk](mailto:richard.brown@npl.co.uk)

### Electronic Supplementary Information

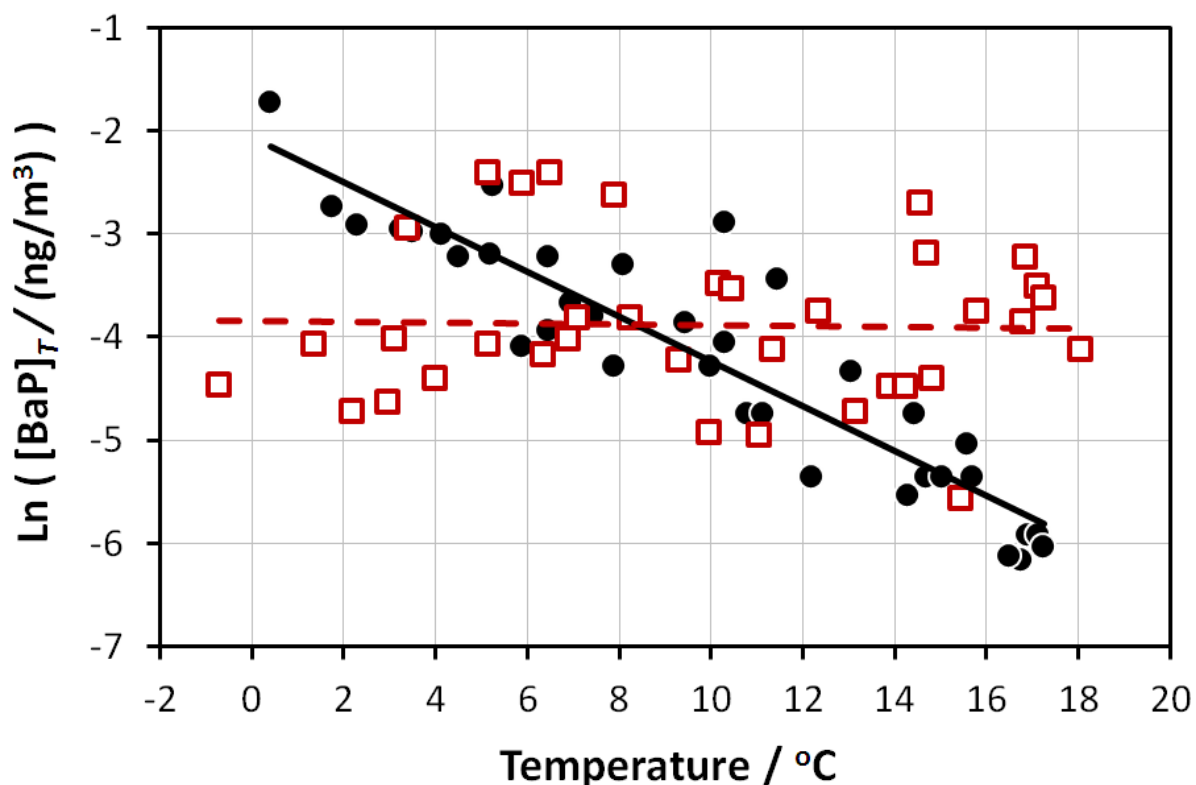

**Figure ESI 1.** The fits of monthly average BaP concentration against monthly average temperature from 2008 to 2010 at the UK PAH monitoring stations at Bolsover (solid black circles, solid black trendline,  $R^2 = 0.85$ ) and Scunthorpe Low Santon (empty red squares, dashed red trendline,  $R^2 = 0.00$ ).
